# Supplementary material for: A Physiologically Based Pharmacokinetic Model to Predict Determinants of Variability in Epirubicin Exposure and Tissue Distribution
Source: MDPI journal article supplement (doi:10.3390/pharmaceutics15041222), 2023-04-12
Supplement: s1 [file s1]

## Supplemental Data

**Supplemental Table S1:** The mean values and range of all physiological characteristics used in the simple linear regression analysis model. 2000 Sim-Cancer patients were generated in this study.

| Physiological Parameter           | Mean    | Std Dev | 5th centile | 95th centile | P Value (do values differ from 0) |
|-----------------------------------|---------|---------|-------------|--------------|-----------------------------------|
| Age (Years)                       | 66.79   | 14.04   | 42.73       | 88.83        | <0.0001                           |
| Weight (kg)                       | 70.60   | 14.09   | 50.32       | 95.27        | 0.004                             |
| Height (cm)                       | 165.62  | 9.73    | 149.97      | 181.88       | 0.0035                            |
| BSA (m <sup>2</sup> )             | 1.78    | 0.20    | 1.47        | 2.11         | 0.0014                            |
| BMI (kg/m <sup>2</sup> )          | 25.69   | 4.41    | 19.36       | 33.16        | 0.2211                            |
| Haematocrit (%)                   | 37.64   | 4.63    | 30.28       | 45.70        | <0.0001                           |
| Albumin (g/L)                     | 38.18   | 6.90    | 27.76       | 49.99        | <0.0001                           |
| GFR (mL/min/1.73 m <sup>2</sup> ) | 79.80   | 23.62   | 47.61       | 123.08       | <0.0001                           |
| Albumin (g/L)                     | 38.18   | 6.905   | 27.72       | 50.01        | 0.0014                            |
| LiverUGT2B7 (pmol)                | 2965937 | 1512899 | 1143503     | 5901583      | <0.0001                           |
| GutUGT2B7 (pmol)                  | 13751   | 9171    | 3974        | 31676        | 0.7856                            |
| KidneyUGT2B7 (pmol)               | 177510  | 162817  | 41202       | 466093       | <0.0001                           |

**Supplemental Table S2:** Mean and range enzymatic expression of UGTs incorporated into the model.

| Enzyme  | Mean (pmol) | Std Dev    | 5th centile | 95th centile |
|---------|-------------|------------|-------------|--------------|
| Liver   |             |            |             |              |
| UGT1A1  | 1685500.93  | 993902.51  | 500913.21   | 3612128.83   |
| UGT1A3  | 990058.04   | 566915.04  | 371500.68   | 2091593.26   |
| UGT1A4  | 2202537.56  | 1079931.96 | 967923.39   | 4148718.19   |
| UGT1A5  | 0.00        | 0.00       | 0.00        | 0.00         |
| UGT1A6  | 840286.24   | 422171.05  | 342314.82   | 1646158.96   |
| UGT1A7  | 0.00        | 0.00       | 0.00        | 0.00         |
| UGT1A8  | 0.00        | 0.00       | 0.00        | 0.00         |
| UGT1A9  | 1260309.51  | 713121.23  | 351967.04   | 2557354.27   |
| UGT1A10 | 848.42      | 424.01     | 334.97      | 1651.86      |
| UGT2B4  | 2263846.38  | 1110017.02 | 959048.99   | 4423238.59   |
| UGT2B7  | 2965937.20  | 1512898.54 | 1143637.73  | 5894268.63   |
| UGT2B10 | 276816.45   | 141780.73  | 107524.68   | 536167.74    |
| UGT2B11 | 0.00        | 0.00       | 0.00        | 0.00         |
| UGT2B15 | 754277.95   | 750628.57  | 62731.22    | 2139367.98   |
| UGT2B17 | 153075.36   | 141330.66  | 15303.50    | 417525.92    |
| UGT2B28 | 0.00        | 0.00       | 0.00        | 0.00         |
| Kidney  |             |            |             |              |
| UGT1A1  | 18873.94    | 18302.13   | 3524.75     | 54716.17     |
| UGT1A3  | 0.00        | 0.00       | 0.00        | 0.00         |
| UGT1A4  | 31972.12    | 27400.22   | 6617.03     | 83472.37     |
| UGT1A5  | 0.00        | 0.00       | 0.00        | 0.00         |
| UGT1A6  | 13254.10    | 11197.18   | 2818.93     | 34990.87     |
| UGT1A7  | 48286.99    | 43588.42   | 10040.55    | 129462.17    |

|         |           |           |          |           |
|---------|-----------|-----------|----------|-----------|
| UGT1A8  | 18093.15  | 15089.74  | 3964.87  | 46689.78  |
| UGT1A9  | 273796.48 | 247215.96 | 41429.33 | 742289.63 |
| UGT1A10 | 62582.66  | 58719.85  | 13084.64 | 166188.26 |
| UGT2B4  | 1134.54   | 1038.68   | 244.67   | 3012.61   |
| UGT2B7  | 177510.02 | 162816.84 | 41241.74 | 465485.96 |
| UGT2B10 | 0.00      | 0.00      | 0.00     | 0.00      |
| UGT2B11 | 0.00      | 0.00      | 0.00     | 0.00      |
| UGT2B15 | 346.23    | 446.85    | 17.86    | 1154.06   |
| UGT2B17 | 0.00      | 0.00      | 0.00     | 0.00      |
| UGT2B28 | 0.00      | 0.00      | 0.00     | 0.00      |

**Supplemental Table S3:** Multivariate linear regression analysis of the model predicted variables affecting epirubicin LnAUC and their respective linearity regarding LnAUC with the exclusion of BSA. R<sup>2</sup> of the model is 0.8324.

| Variable    | Estimated Ln AUC (ng/mL.h) | Standard error | Range (95% CI)           | R <sup>2</sup> with other variables | P value |
|-------------|----------------------------|----------------|--------------------------|-------------------------------------|---------|
| Intercept   | 8.556                      | 0.02954        | 8.498 to 8.614           |                                     | <0.0001 |
| Sex[0]      | -0.07619                   | 0.003993       | -0.08402 to -0.06836     | 0.05004                             | <0.0001 |
| Age         | 0.003195                   | 0.0001937      | 0.002816 to 0.003575     | 0.4880                              | <0.0001 |
| Haematocrit | -0.005730                  | 0.0004210      | -0.006556 to -0.004905   | 0.003825                            | <0.0001 |
| Albumin     | 0.01125                    | 0.0002840      | 0.01069 to 0.01180       | 0.01507                             | <0.0001 |
| GFR         | -0.0007297                 | 0.0001087      | -0.0009428 to -0.0005166 | 0.4251                              | <0.0001 |

|                  |             |            |                               |         |         |
|------------------|-------------|------------|-------------------------------|---------|---------|
| Liver UGT2B7     | -9.052e-008 | 1.476e-009 | -9.342e-008<br>to -8.763e-008 | 0.2403  | <0.0001 |
| Kidney<br>UGT2B7 | -2.959e-007 | 1.206e-008 | -3.196e-007<br>to -2.723e-007 | 0.01765 | <0.0001 |

Model variables; sex 0=Female, 1=Male, age (years), haematocrit (%), albumin (g/L), glomerular filtration rate (GFR) (mL/min/1.73m<sup>2</sup>), liver UGT2B7 (pmol), kidney UGT2B7 (pmol).
